# Supplementary material for: Mottled Mice and Non-Mammalian Models of Menkes Disease
Source: PubMed Central journal article supplement (PMC4684000; doi:10.3389/fnmol.2015.00072), 2015-12-18
Supplement: Image_1.pdf [file Image_1.pdf]

|            | Cu-binding             | HMA1                                                                                              |
|------------|------------------------|---------------------------------------------------------------------------------------------------|
| Mouse1     | MEPSVDANSITITVEGMTCISV | VRTIEQQIGKVNGVHHIKVSLEEKSATIIYDPKLTQPKTLQEAIDDMGFDA                                               |
| Mouse2     | MEPSVDANSITITVEGMTCISV | VRTIEQQIGKVNGVHHIKVSLEEKSATIIYDPKLTQPKTLQEAIDDMGFDA                                               |
| Human1     | MDPSMGVNSVTISVEGMTCNSV | VWTIEQQIGKVNGVHHIKVSLEEKSNATIIYDPKLTQPKTLQEAIDDMGFDA                                              |
| Human2     | MDPSMGVNSVTISVEGMTCNSV | VWTIEQQIGKVNGVHHIKVSLEEKSNATIIYDPKLTQPKTLQEAIDDMGFDA                                              |
| Danio      | MALSTNLRCRVTLGVEGMTCGS | VQSIEGRIGGLPGVIHIQVSLQNNATVYDHTQHTPQSIAADIEDMGFESS                                                |
| Drosophila | -----                  | -----                                                                                             |
| All        |                        |                                                                                                   |
| All w/D.m. | * *                    | : *: ***** ** : ** : * : ** * : * : * : * : * : * : * : * : * : * : * : * : * : * : * : * : * : * |
| All w/H2   |                        |                                                                                                   |

|            | Cu-binding                            | HMA2                                                                                                                           |
|------------|---------------------------------------|--------------------------------------------------------------------------------------------------------------------------------|
| Mouse1     | QQRSAVVTIIPSVVSASQIVELVPDLSLDMGTQEKKS | GACEEHS TPQAGEVLMKMKVEGMTC                                                                                                     |
| Mouse2     | QQRSAVVTIIPSVVSASQIVELVPDLSLDMGTQEKKS | GACEEHS TPQAGEVLMKMKVEGMTC                                                                                                     |
| Human1     | QKRTVAVTIIPSVVNAQIKELVPELSLDTGTLEKKS  | GACEDHSMQAAGEVLMKMKVEGMTC                                                                                                      |
| Human2     | QKRTVAVTIIPSVVNAQIKELVPELSLDTGTLEKKS  | GACEDHSMQAAGEVLMKMKVEGMTC                                                                                                      |
| Danio      | DNQGLAVTFVPSLVSEDQLGEVLKCLAPDTACRPP   | PLSPKEGSTSRSFSGVEAVKMRIEGMVLSCTTTIEGKIGKLKRGVEKIKVSLESQEAAVVYLPYIITVDEIVKQIEVAGFKATVKS                                         |
| Drosophila | -----                                 | -----                                                                                                                          |
| All        |                                       |                                                                                                                                |
| All w/D.m. | :::                                   | .* : * : * : * : * : * : * : * : * : * : * : * : * : * : * : * : * : * : * : * : * : * : * : * : * : * : * : * : * : * : * : * |
| All w/H2   |                                       |                                                                                                                                |

|            | Cu-binding                          | HMA3                                                                                    |
|------------|-------------------------------------|-----------------------------------------------------------------------------------------|
| Mouse1     | QPKYLKLG AIDVERLKNTFPVKSSEGSQQKSPSP | SDSTMF TIEGMHCK                                                                         |
| Mouse2     | QPKYLKLG AIDVERLKNTFPVKSSEGSQQKSPSP | SDSTMF TIEGMHCK                                                                         |
| Human1     | QPKYLKLG AIDVERLKNTFPVKSSEGSQQRSPSY | TNDSTAFFIIDGMHCK                                                                        |
| Human2     | QPKYLKLG AIDVERLKNTFPVKSSEGSQQRSPSY | TNDSTAFFIIDGMHCK                                                                        |
| Danio      | KPRQLKLSASEVERLLSAPKQTEEKL--SEPPAD  | STVTTL FQVGTGMHCNS                                                                      |
| Drosophila | -----                               | -----                                                                                   |
| All        |                                     |                                                                                         |
| All w/D.m. | * : *                               | : * : * : * : * : * : * : * : * : * : * : * : * : * : * : * : * : * : * : * : * : * : * |
| All w/H2   |                                     |                                                                                         |

|            | Cu-binding                      | HMA4                                                                                    |
|------------|---------------------------------|-----------------------------------------------------------------------------------------|
| Mouse1     | SSLQKMP LNIVSQPLTQEAVININGMTCNS | CVQSIIEGVISKKPGVKSIHVS                                                                  |
| Mouse2     | SSLQKMP LNIVSQPLTQEAVININGMTCNS | CVQSIIEGVISKKPGVKSIHVS                                                                  |
| Human1     | SSLQKIP LNIVSQPLTQETVINIDGMTCNS | CVQSIIEGVISKKPGVKSIHVS                                                                  |
| Human2     | SSLQKIP LNIVSQPLTQETVINIDGMTCNS | CVQSIIEGVISKKPGVKSIHVS                                                                  |
| Danio      | PGFLQPLVSVAEIHIEGMTCGS          | CVQSIIEGTLQKQGVRS                                                                       |
| Drosophila | -----                           | -----                                                                                   |
| All        |                                 |                                                                                         |
| All w/D.m. | .                               | : * : * : * : * : * : * : * : * : * : * : * : * : * : * : * : * : * : * : * : * : * : * |
| All w/H2   |                                 |                                                                                         |

|            | Cu-binding                  | HMA5                                                                                    | Cu-binding             | HMA6                     |
|------------|-----------------------------|-----------------------------------------------------------------------------------------|------------------------|--------------------------|
| Mouse1     | MTSVQNKCYIQVSGMTCAS         | CVANIERNLRREEG IY SVLVALMAGKAEVRYP                                                      | PAVIAEQPRVIAEFIRELGFGA | MVMENAGEGN GILELVVVRG    |
| Mouse2     | MTSVQNKCYIQVSGMTCAS         | CVANIERNLRREEG IY SVLVALMAGKAEVRYP                                                      | PAVIAEQPRVIAEFIRELGFGA | MVMENAGEGN GILELVVVRG    |
| Human1     | TPVQDKEEGKNSKCYIQVGTG MTCAS | CVANIERNLRREEG IY SVLVALMAGKAEVRYP                                                      | PAVIAEQPMIAEFIRELGFGA  | TVIENADEGDG VLELVVVRG    |
| Human2     | TPVQDKEEGKNSKCYIQVGTG MTCAS | CVANIERNLRREEG IY SVLVALMAGKAEVRYP                                                      | PAVIAEQPMIAEFIRELGFGA  | TVIENADEGDG VLELVVVRG    |
| Danio      | AESDAEPSTNTISKCFIQIGGMTCAS  | CVANIERNLNKNEYGIH SVLVALMAGKAEVRYP                                                      | SVIDPLRIAELIRELGFTAT   | VMDNYDGS DGSLELVVVRG     |
| Drosophila | SAVAIPVEQELTKCFLHIRGMTCAS   | CVAAIEKHCKKIYGLD SILVALLAAKAEVKNAN                                                      | VVTAENIAKSITELGFPT     | ELIDEPDN GEAEVLEIMGMTCAS |
| All        |                             |                                                                                         |                        |                          |
| All w/D.m. | .                           | : * : * : * : * : * : * : * : * : * : * : * : * : * : * : * : * : * : * : * : * : * : * |                        |                          |
| All w/H2   |                             |                                                                                         |                        |                          |
